# Supplementary material for: Spatial Distribution of Air Pollution, Hotspots and Sources in an Urban-Industrial Area in the Lisbon Metropolitan Area, Portugal—A Biomonitoring Approach
Source: MDPI journal article supplement (doi:10.3390/ijerph19031364), 2022-01-26
Supplement: s1 [file s1]

## 5. Supplementary Information

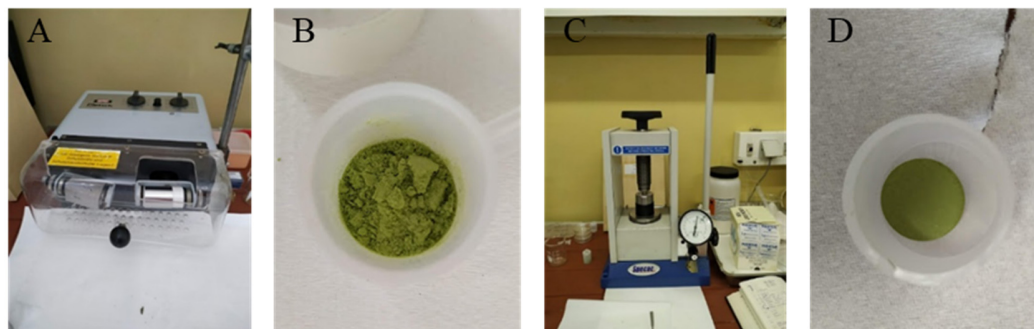

**Figure S1.** Procedure for preparation of pellets: (A) used ball mill RETSCH, (B) homogenised powder of lichen sample, (C) used Pelletiser SPECAC, and (D) pellet of a lichen sample.

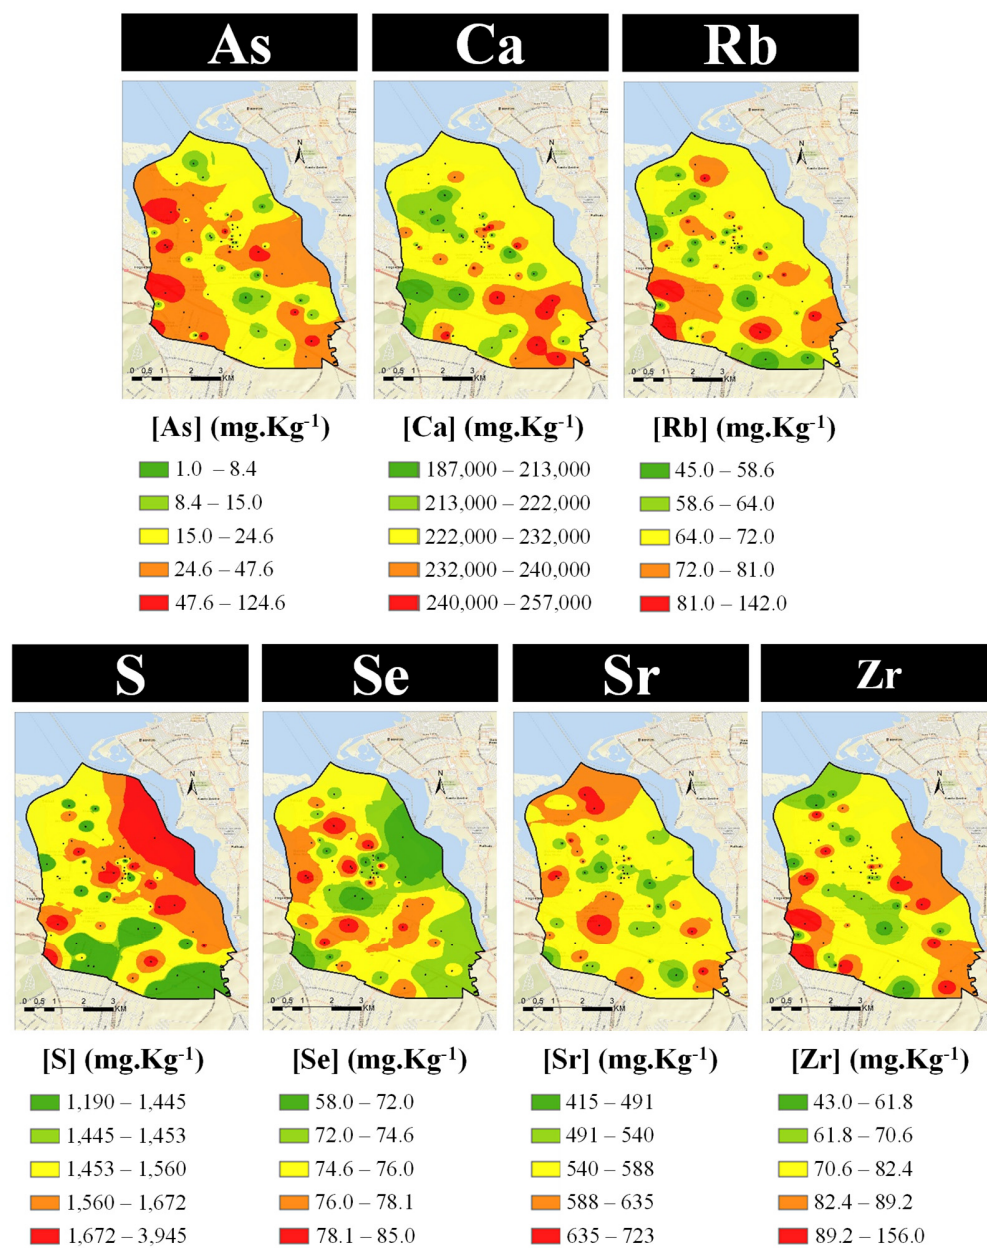

**Figure S2.** Spatial distribution of elements without a specific identified source.

**Table S1.** Reference values of soil composition (in mg.Kg<sup>-1</sup>) defined by Mason and Moore [42], used for the calculation of the Enrichment factors.

| Element | Mean crustal concentration (mg.Kg <sup>-1</sup> ) |
|---------|---------------------------------------------------|
| Al      | 81300                                             |
| As      | 1.8                                               |
| Br      | 2.5                                               |
| Ca      | 36300                                             |
| Co      | 25                                                |
| Cr      | 100                                               |
| Cu      | 55                                                |
| Fe      | 50000                                             |
| K       | 25900                                             |
| Mg      | 20900                                             |
| Mn      | 950                                               |
| Pb      | 13                                                |
| Rb      | 90                                                |
| S       | 260                                               |
| Se      | 0.05                                              |
| Si      | 277200                                            |
| Sr      | 375                                               |
| Ti      | 4400                                              |
| Zn      | 70                                                |
| Zr      | 165                                               |
